# Supplementary material for: RELATIVE BIOLOGICAL EFFECTIVENESS OF INTERMEDIATE-ENERGY NEUTRONS (BASED ON PHAGE INDUCTION).
Source: Royal Society of Chemistry journal article supplement (doi:10.1039/d2cp00381c), 1968-10-31
Supplement: d2cp00381c1.pdf [file d2cp00381c1.pdf]

# First-order hyperpolarizabilities of propellanes: Elucidating structure-property relationships

## ELECTRONIC SUPPLEMENTARY INFORMATION

Bartosz Krajewski,<sup>a</sup> Swati Singh Rajput,<sup>b</sup> Marta Chołuj,<sup>c</sup> Elżbieta Wojaczyńska,<sup>c</sup> Andrzej Miniewicz,<sup>c</sup>  
Md. Mehboob Alam,<sup>\*,b</sup> Robert Zaleśny<sup>\*,c</sup>

<sup>a</sup> *Department of Theoretical Physics, Faculty of Fundamental Problems of Technology, Wrocław University of Science and Technology, Wyb. Wyspiańskiego 27, PL–50370 Wrocław, Poland*

<sup>b</sup> *Department of Chemistry, Indian Institute of Technology Bhilai, Sejbahar, Raipur, Chhattisgarh – 492015, India*

<sup>c</sup> *Faculty of Chemistry, Wrocław University of Science and Technology, Wyb. Wyspiańskiego 27, PL–50370 Wrocław, Poland*

*\*E-mail: mehboob@iitbhilai.ac.in (M.M.A.), robert.zalesny@pwr.edu.pl (R.Z.)*

Table S 1: Vectorial electronic and harmonic vibrational contributions to the first hyperpolarizability (in au) as computed using aug-cc-pVDZ basis set. The values obtained using 6-31+G basis set are shown in parentheses. Note that the sign differences observed for some compounds (e.g. **4** and **10**) are due to different orientation of the dipole moment vector (with an absolute value close to zero).

| compound | $\beta_{  }^e$ | $[\mu\alpha]_{  }^{(0,0)}$ |
|----------|----------------|----------------------------|
| 1        | 196            | (239)                      |
| 2        | 218            | (178)                      |
| 3        | 246            | (284)                      |
| 4        | -521           | (-553)                     |
| 5        | 112            | (55)                       |
| 6        | 247            | (177)                      |
| 7        | 534            | (537)                      |
| 8        | 212            | (236)                      |
| 9        | 251            | (290)                      |
| 10       | 449            | (-489)                     |
| 11       | 1198           | (1367)                     |
| 12       | 368            | (405)                      |
| 13       | 710            | (811)                      |
| 14       | 214            | (231)                      |
| 15       | 1087           | (1326)                     |
| 16       | 22             | (-121)                     |

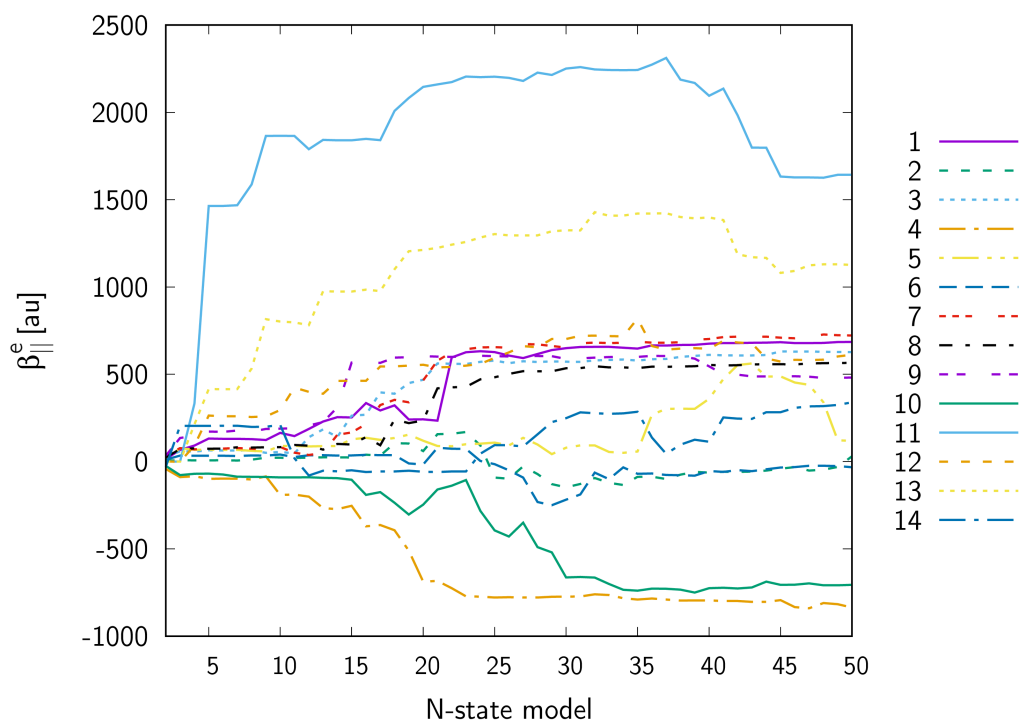

Figure S1: Convergence of the electronic first hyperpolarizability (in au) for **11-14** with the number of electronic states ( $N$ -state model accounts also for electronic ground state). Calculations were performed at CAM-B3LYP/6-31+G level of theory.
